# Supplementary material for: Variability in sediment particle size, mineralogy, and Fe mode of occurrence across dust-source inland drainage basins: the case of the lower Drâa Valley, Morocco
Source: Copernicus journal article supplement (doi:10.5194/acp-23-15815-2023), 2023-12-22
Supplement: Supplementary file 1 [file acp-23-15815-2023-supplement.pdf]

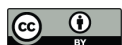

*Supplement of*

**Variability in sediment particle size, mineralogy, and Fe mode of occurrence across dust-source inland drainage basins: the case of the lower Drâa Valley, Morocco**

**Adolfo González-Romero et al.**

*Correspondence to:* Adolfo González-Romero (agonzal3@bsc.es) and Xavier Querol (xavier.querol@idaea.csic.es)

The copyright of individual parts of the supplement might differ from the article licence.

## SUPPLEMENTARY MATERIAL

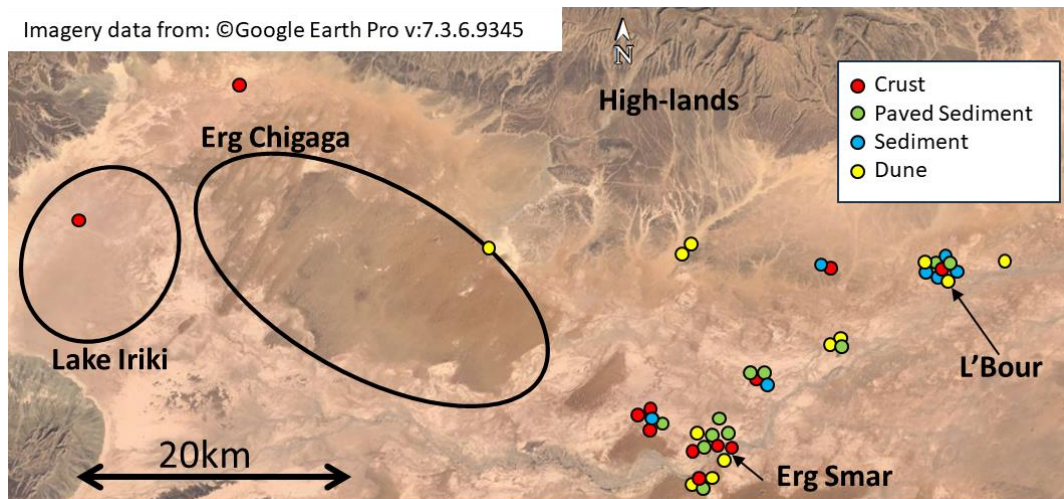

Figure S1. Map of the samples at the Lower Drâa Basin, S. Morocco. Type of samples: red dots: crusts, green dots: paved sediments, blue dots: sediments and yellow dots: dunes. Position is approximate for a better visualization of the samples.

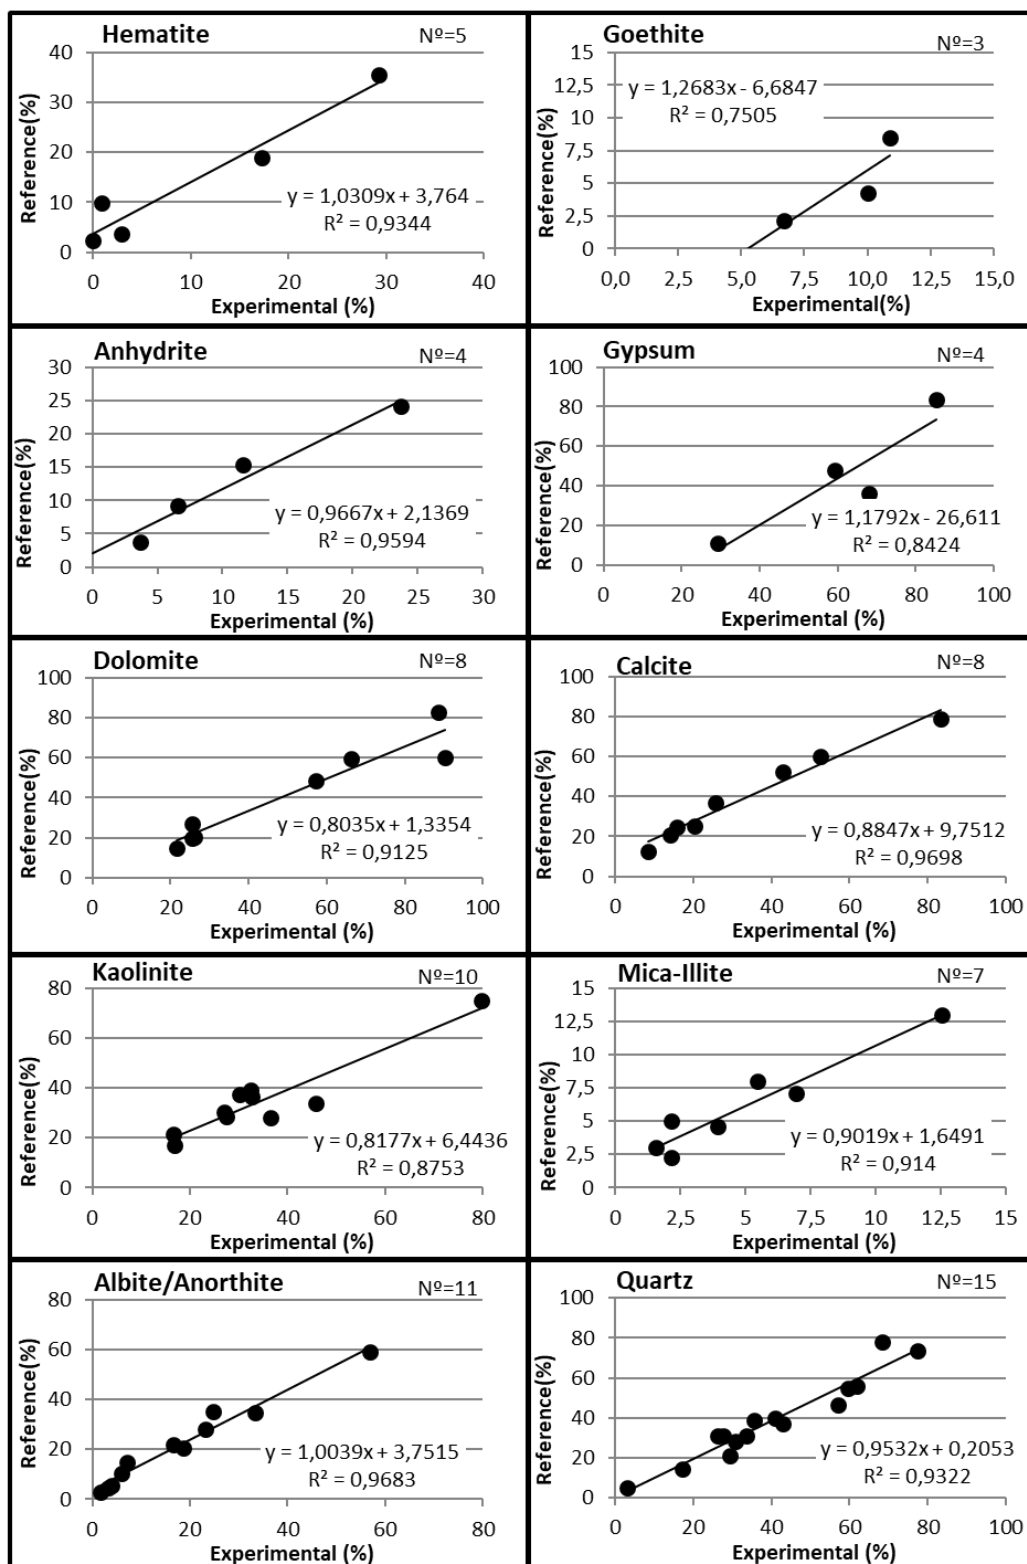

Figure S2. Cross correlation analysis of the content of minerals in mixtures of reference materials and the results obtained by using the internal reference method in this study. R2, the regression equation and the number of samples analysed are represented on the graphic. All the values are % of mineral in mass.

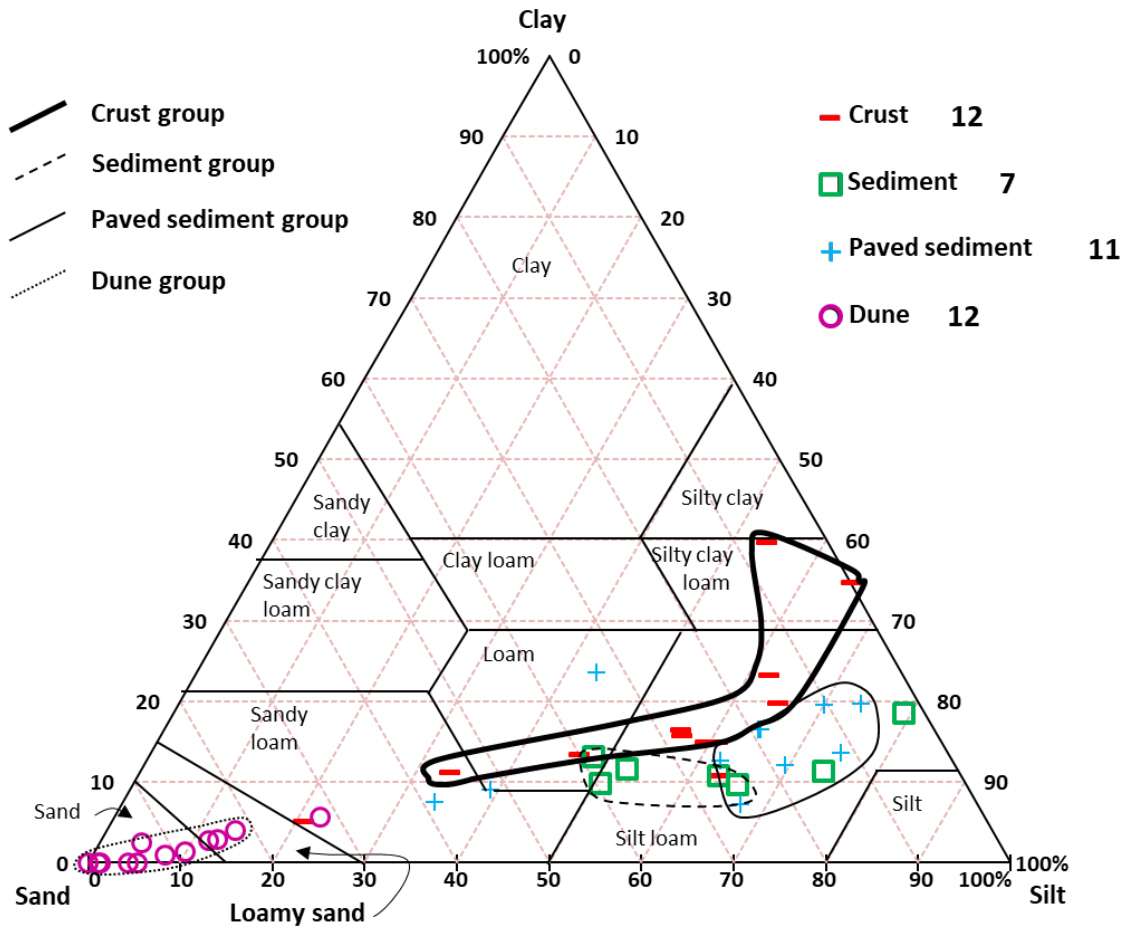

Figure S3. Ternary diagram for sand, silt and clay fractions, extracted from Valentin and Bresson (1992). Samples are differentiated by marker types and grouped with line types. Numbers in the legend indicate the number of samples represented in every group.

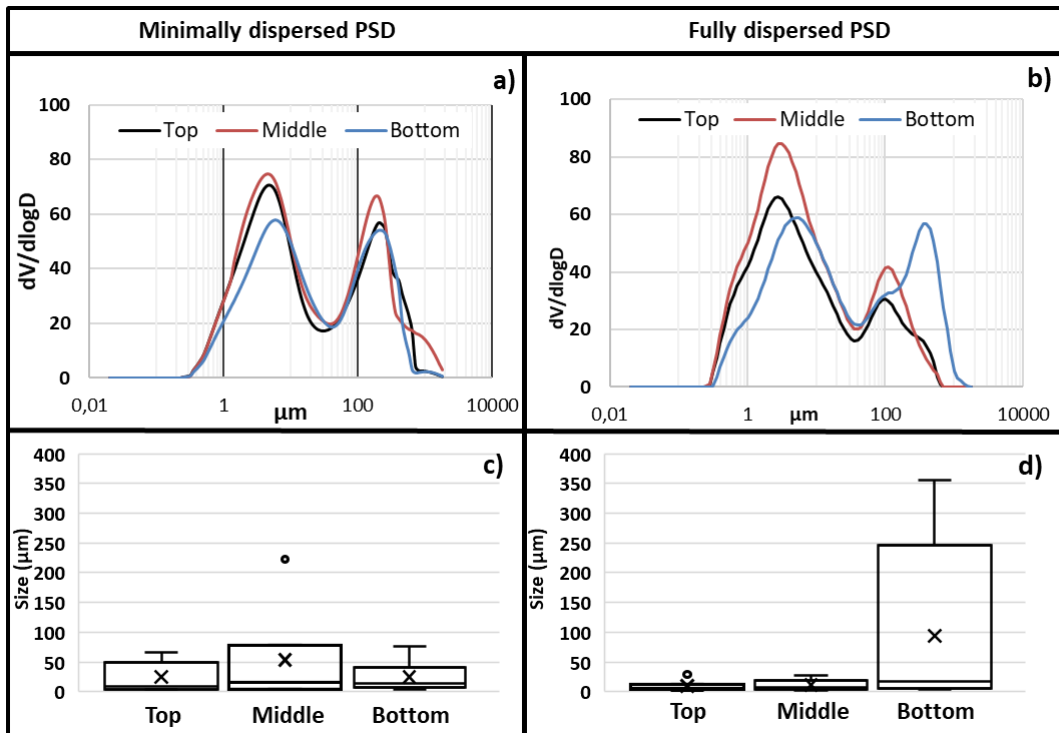

Figure S4. (a) MDPSD and (b) FDPSD from top, middle and bottom sections of crusts; Mean particle size median diameter from c) FDPSD and d) MDPSD.

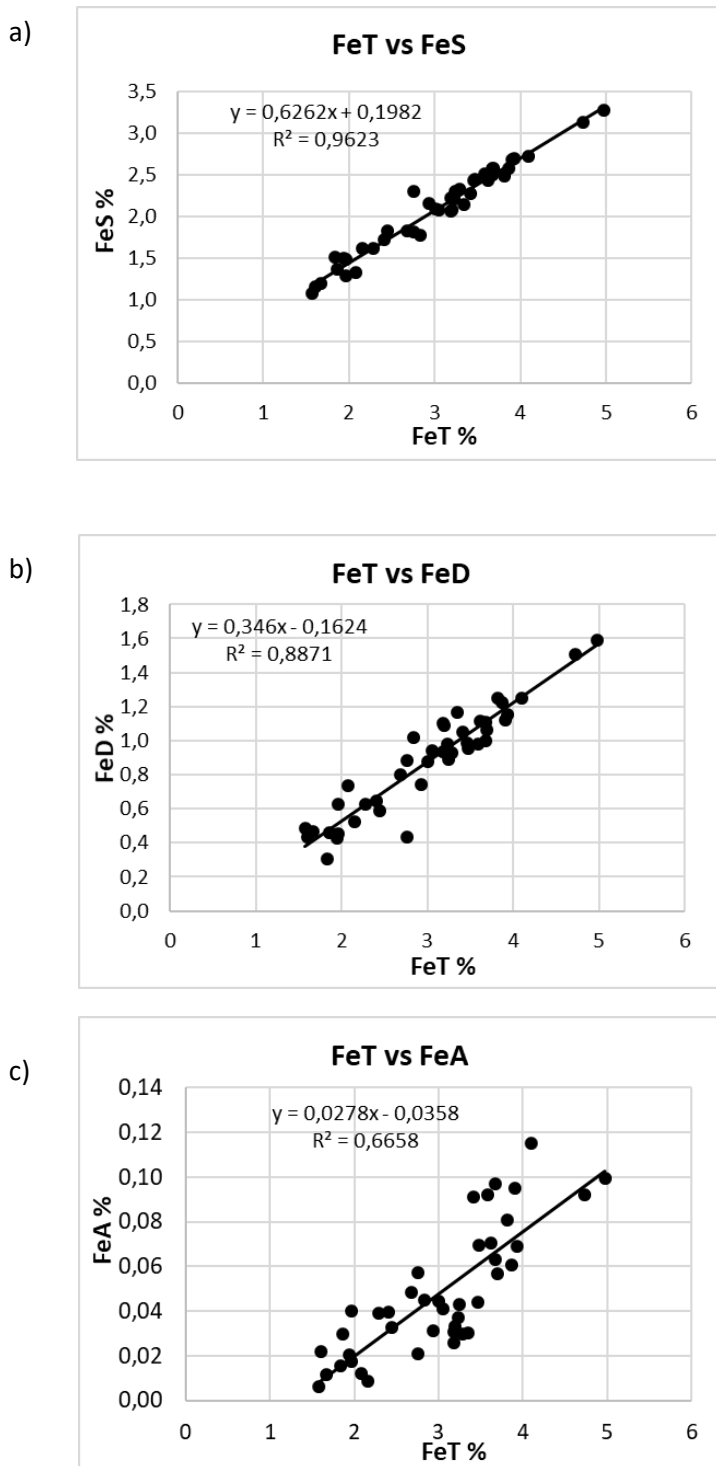

Figure S5. Linear correlations between FeS (structural iron in minerals like clays) a), FeD (iron in minerals like hematite and goethite) b) and FeA (iron adsorbed in clays and nanosized Ferrihydrite ( $\text{Fe}_{4-5}(\text{OH},\text{O})_{12}$ ) c) and FeT (Total iron content).

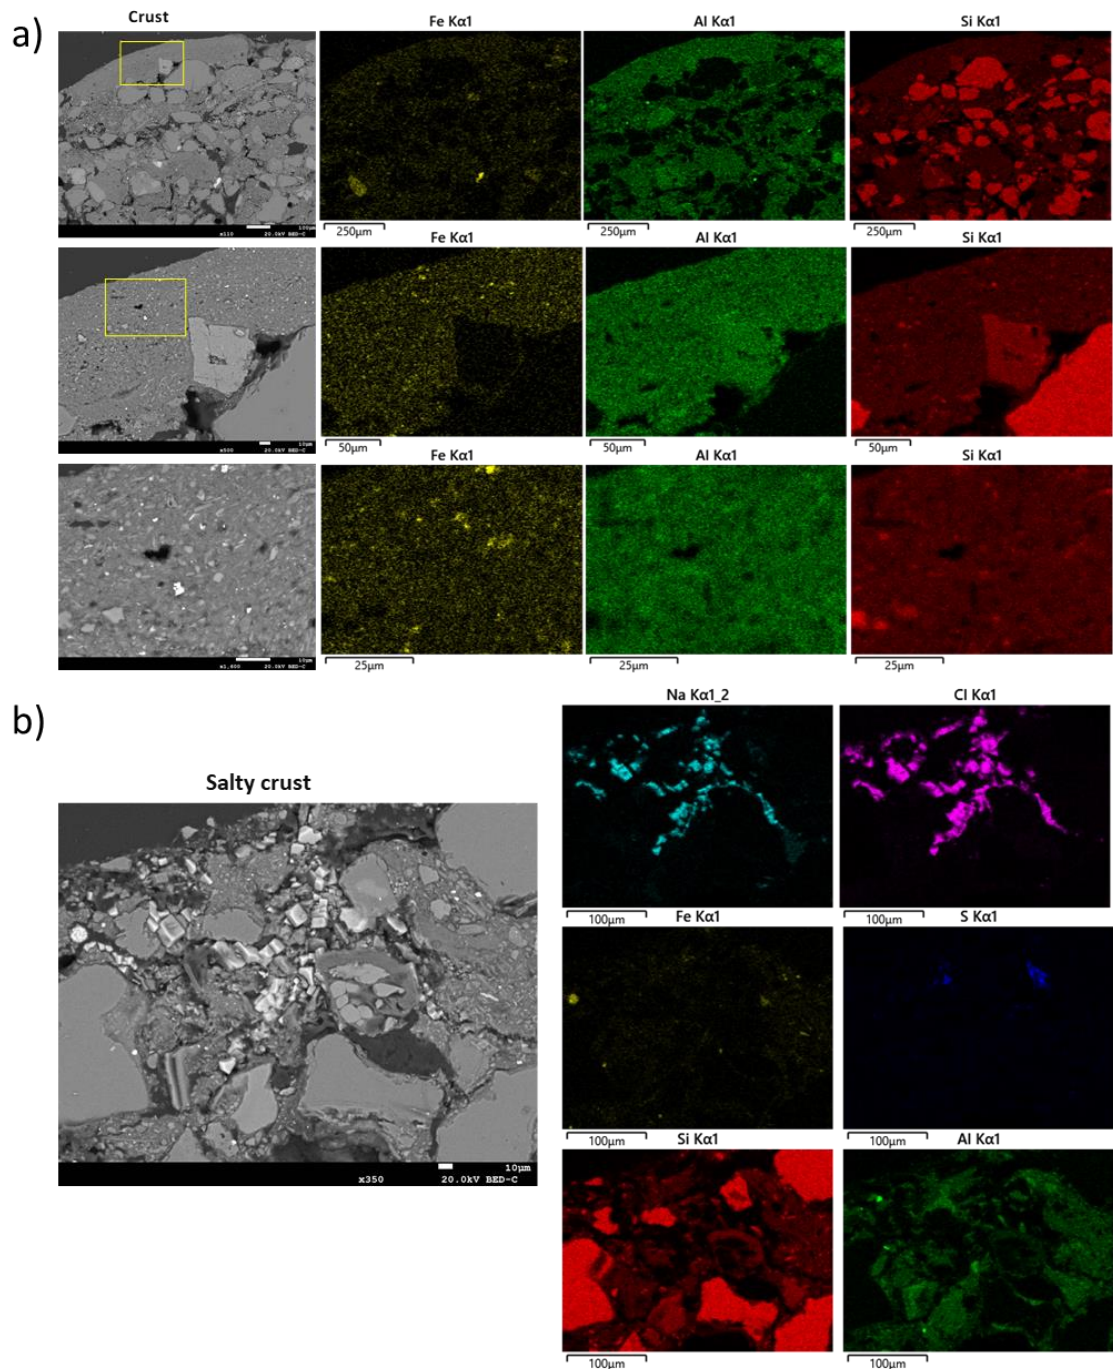

Figure S6. a) Scanning electron microscope of the top section of a crust with a zoom in on a small part, together with the elemental mapping of Fe, Al and Si with presence of homogeneous presence of iron (silicates and iron oxides). b) Detailed scanning electron microscope image and elemental mapping with Na, Cl, Fe, S, Si and Al for a very top section of a salty crust with very well formed halite crystals.

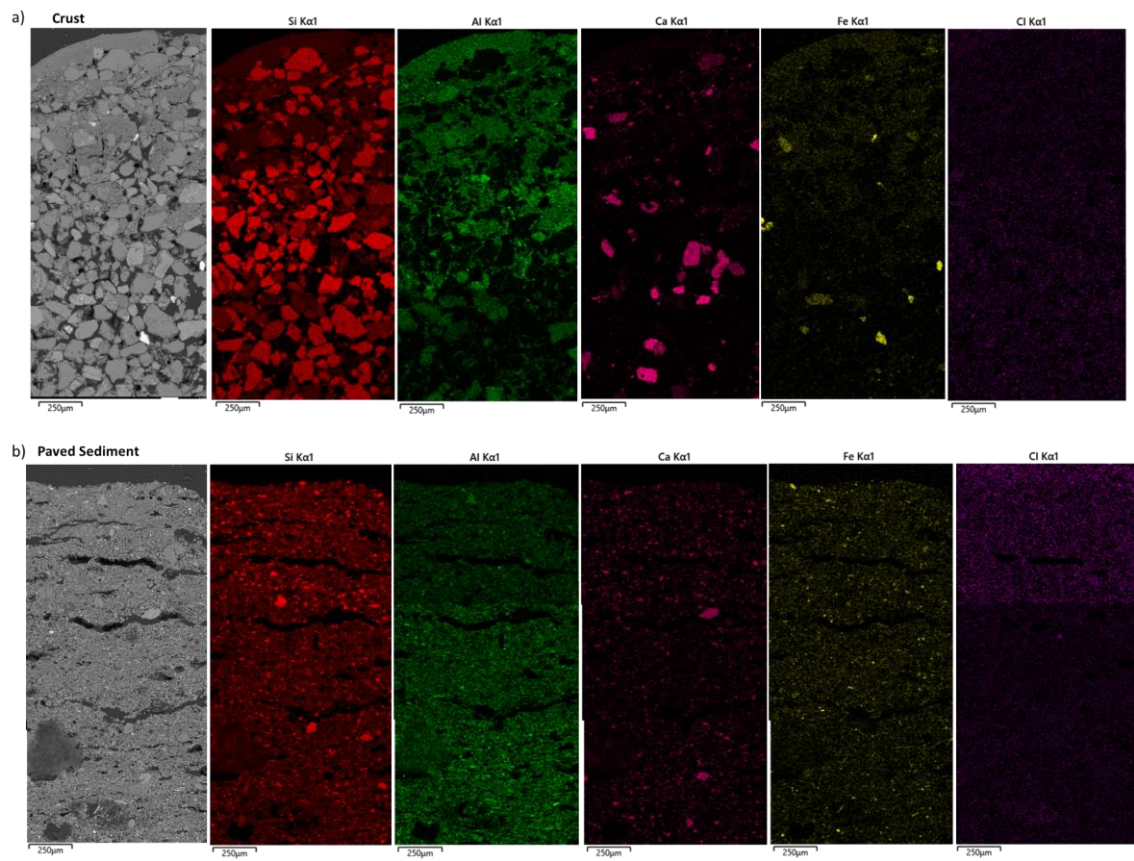

Figure S7. Crust a) and paved sediment b) profile of the first millimetres from the low-lands on the scanning electron microscope with elemental mapping of Si, Al, Ca, Fe and Cl.



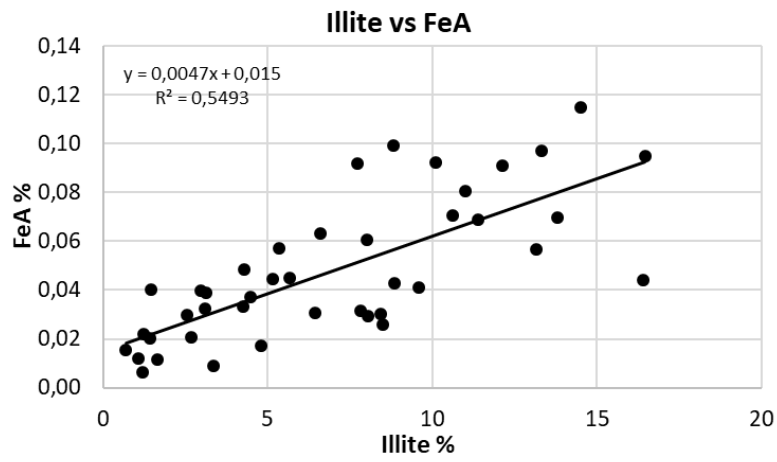

Figure S8. Correlation between most present clay (Illite) and readily exchangeable Fe (FeA).

Table S1. Sample summarize of MDPSD and FDPD. N° is the n° of sample, Coord. Are the coordinates of the samples, ES: Erg Smar, LB: L'Bour and HL: High-lands, MDPSD: Minimally dispersed particle size distribution and FDPD: Fully dispersed particle size distribution.

| N°  | Coord.       | Coord.     | Type      | Location | MDPSD (µm) | FDPD (µm) |
|-----|--------------|------------|-----------|----------|------------|-----------|
| 1   | 29°42'800"   | 6°01,972'  | CRUST     | ES       | 85         | 9.0       |
| 2   | 29°42'801"   | 6°01,975'  | CRUST     | ES       | 84         | 8.5       |
| 8   | 29°43'607"   | 6°04,964'  | CRUST     | ES       | 147        | 5.2       |
| 11  | 29°43'603"   | 6°04,966'  | CRUST     | ES       | 21         | 2.9       |
| 12  | 29°43'604"   | 6°04,963'  | CRUST     | ES       | 110        | 6.1       |
| 14  | 29°45'592    | 5°59,585'  | CRUST     | ES       | 104        | 10        |
| 25  | 29°49,674'   | 5°52,436'  | CRUST     | LB       | 20         | 17        |
| 31  | 29°49,631'   | 5°57,335'  | CRUST     | HL       | 99         | 80        |
| 34  | 29°41,505'   | 6°02,872'  | CRUST     | ES       | 181        | 9.1       |
| 40  | 29°42,933    | 6°01,990   | CRUST     | ES       | 320        | 2.7       |
| 108 | 29°56,604    | 6°23,267   | CRUST     | HL       | 89         | 20        |
| 109 | 29°51,590    | 6°29,762   | CRUST     | HL       | 93         | 272       |
| 10  | 29°43'604"   | 6°04,964'  | SEDIMENT  | ES       | 147        | 5.8       |
| 15  | 29°45'592    | 5°59,585'  | SEDIMENT  | ES       | 83         | 39        |
| 19  | 29°49,670'   | 5°52,434'  | SEDIMENT  | LB       | 20         | 13        |
| 27  | 29°49,674'   | 5°52,436'  | SEDIMENT  | LB       | 23         | 18        |
| 29  | 29°49,649'   | 5°52,382'  | SEDIMENT  | LB       | 68         | 16        |
| 32  | 29°49,631'   | 5°57,335'  | SEDIMENT  | HL       | 97         | 12        |
| 49  | 29°49'31.53" | °52'26.09" | SEDIMENT  | LB       | 49         | 16        |
| 4   | 29°42'800"   | 6°01,972'  | PAVED SED | ES       | 25         | 12        |
| 7   | 29°42'542"   | 6°02,053'  | PAVED SED | ES       | 19         | 8.3       |
| 9   | 29°43'604"   | 6°04,964'  | PAVED SED | ES       | 74         | 5.9       |
| 16  | 29°45'592    | 5°59,585'  | PAVED SED | ES       | 105        | 7.5       |
| 17  | 29°45'592    | 5°59,585'  | PAVED SED | ES       | 94         | 78        |
| 18  | 29°49,670'   | 5°52,434'  | PAVED SED | LB       | 152        | 5.3       |
| 35  | 29°41,505'   | 6°02,872'  | PAVED SED | ES       | 48         | 19        |
| 41  | 29°42,933    | 6°01,990   | PAVED SED | ES       | 148        | 6.8       |
| 42  | 29°42,933    | 6°01,990   | PAVED SED | ES       | 31         | 8.1       |
| 46  | 29°47,196    | 5°56,724   | PAVED SED | LB       | 89         | 67        |
| 50  | 29°49'31.53" | °52'26.09" | PAVED SED | LB       | 29         | 14        |
| 5   | 29°43'203"   | 6°02,171'  | DUNE      | ES       | 282        | 263       |
| 6   | 29°43'203"   | 6°02,171'  | DUNE      | ES       | 263        | 243       |
| 26  | 29°49,674'   | 5°52,436'  | DUNE      | LB       | 132        | 138       |
| 33  | 29°41,505'   | 6°02,872'  | DUNE      | ES       | 244        | 239       |
| 36  | 29°41,532'   | 6°02,900   | DUNE      | ES       | 355        | 308       |
| 43  | 29°47,196    | 5°56,724   | DUNE      | LB       | 159        | 128       |
| 44  | 29°47,196    | 5°56,724   | DUNE      | LB       | 143        | 132       |
| 47  | 29°50,049    | 5°52,002   | DUNE      | LB       | 192        | 159       |
| 48  | 29°49,870    | 5°48,318   | DUNE      | LB       | 244        | 272       |
| 103 | 29°50,927    | 6°2,591    | DUNE      | HL       | 195        | 169       |
| 104 | 29°50,927    | 6°2,591    | DUNE      | HL       | 197        | 268       |
| 107 | 29°50,791    | 6°12,274   | DUNE      | HL       | 243        | 312       |

Table S2. Average particle size (fully dispersed PSD, FD-PSD and minimally dispersed PSD, MD-PSD) and mineralogy of crusts in this study compared to global dust samples. Note that in this study samples are crust sediments, and in the others deposited dust.

| Samples          | Region               | Reference                   | Particle size (%) |           |           |           | Minerals (%) |           |          |  |
|------------------|----------------------|-----------------------------|-------------------|-----------|-----------|-----------|--------------|-----------|----------|--|
|                  |                      |                             | Silt+Clay         | Sand      | Quartz    | Feldspars | Carbonates   | Clays     | Others   |  |
| Crust            | <b>Morocco</b>       | <b>Present study FD-PSD</b> | <b>72</b>         | <b>28</b> | <b>44</b> | <b>8</b>  | <b>28</b>    | <b>17</b> | <b>3</b> |  |
| Crust            | <b>Morocco</b>       | <b>Present study MD-PSD</b> | <b>41</b>         | <b>59</b> | <b>44</b> | <b>8</b>  | <b>28</b>    | <b>17</b> | <b>3</b> |  |
| Dep. dust        | Kuwait               | Al-Dousari et al. 2019      | 63                | 37        | 38        | 10        | 45           | 2         | 5        |  |
| Dep. dust        | Ahwar-Iraq           | Doronzo et al. 2016         | 97                | 3         | 13        | 8         | 80           | 0         | 0        |  |
| Dep. dust        | Manamah-Bahrain      | Al-Dousari et al. 2019      | 87                | 12        | 32        | 10        | 41           | 3         | 15       |  |
| Dep. dust        | Walameen-South Saudi | Al-Dousari et al. 2020      | 61                | 40        | 62        | 24        | 13           | 1         | 0        |  |
| Dep. dust        | Ain-Emirates         | Al-Dousari et al. 2018      | 4                 | 97        | 26        | 20        | 52           | 1         | 0        |  |
| Dep. dust        | Dubai-Emirates       | Subramaniam et al. 2015     | 82                | 17        | 21        | 6         | 45           | 0         | 27       |  |
| Dep. dust        | Amman-Jordan         | Alshemmari et al. 2013      | 70                | 30        | 21        | 4         | 68           | 0         | 7        |  |
| Dep. dust        | Tripoli-Libya        | Al-Ghadban et al. 1999      | 81                | 20        | 64        | 5         | 27           | 4         | 0        |  |
| Dep. dust        | Cairo-Egypt          | Al-Dousari et al. 2020      | 90                | 10        | 51        | 15        | 34           | 0         | 0        |  |
| Dep. dust        | Cartagena-Colombia   | Doronzo et al. 2016         | 90                | 10        | 66        | 33        | 0            | 0         | 1        |  |
| Dep. dust        | Bald Hill-Australia  | Cattle et al. 2002          | 90                | 9         | 57        | 2         | 0            | 14        | 7        |  |
| <b>Dep. dust</b> | <b>Average</b>       |                             | <b>74</b>         | <b>26</b> | <b>41</b> | <b>12</b> | <b>37</b>    | <b>2</b>  | <b>6</b> |  |

Table S3. Summary of Fe mode of occurrence in weight %. Abbreviations are N<sup>o</sup> is the number of the sample, ES: Erg Smar, LB: L'Bour, HL: Highland, FeT: total Fe, FeD: Dithionite Fe, FeA: Ascorbate Fe and FeS: structural Fe.

| N <sup>o</sup> | Type           | Location | FeT | FeD  | FeA  | FeS |
|----------------|----------------|----------|-----|------|------|-----|
| 1              | CRUST          | ES       | 3.8 | 1.2  | 0.08 | 2.5 |
| 2              | CRUST          | ES       | 3.0 | 0.87 | 0.04 | 2.1 |
| 8              | CRUST          | ES       | 4.1 | 1.2  | 0.12 | 2.7 |
| 11             | CRUST          | ES       | 4.7 | 1.5  | 0.09 | 3.1 |
| 12             | CRUST          | ES       | 3.5 | 0.96 | 0.07 | 2.4 |
| 14             | CRUST          | ES       | 3.4 | 1.1  | 0.09 | 2.3 |
| 25             | CRUST          | LB       | 3.3 | 0.93 | 0.03 | 2.3 |
| 31             | CRUST          | HL       | 3.2 | 0.98 | 0.04 | 2.2 |
| 34             | CRUST          | ES       | 3.9 | 1.2  | 0.07 | 2.7 |
| 40             | CRUST          | ES       | 5.0 | 1.6  | 0.10 | 3.3 |
| 108            | CRUST          | HL       | 2.8 | 1.0  | 0.04 | 1.8 |
| 109            | CRUST          | HL       | 2.8 | 0.88 | 0.06 | 1.8 |
| 4              | PAVED SEDIMENT | ES       | 3.5 | 0.99 | 0.04 | 2.4 |
| 7              | PAVED SEDIMENT | ES       | 3.7 | 1.1  | 0.06 | 2.6 |
| 9              | PAVED SEDIMENT | ES       | 3.6 | 0.98 | 0.09 | 2.5 |
| 16             | PAVED SEDIMENT | ES       | 3.7 | 1.0  | 0.10 | 2.6 |
| 17             | PAVED SEDIMENT | ES       | 2.4 | 0.59 | 0.03 | 1.8 |
| 18             | PAVED SEDIMENT | LB       | 3.6 | 1.1  | 0.07 | 2.4 |
| 35             | PAVED SEDIMENT | ES       | 2.9 | 0.74 | 0.03 | 2.2 |
| 41             | PAVED SEDIMENT | ES       | 3.7 | 1.1  | 0.06 | 2.5 |
| 42             | PAVED SEDIMENT | ES       | 3.9 | 1.2  | 0.06 | 2.6 |
| 46             | PAVED SEDIMENT | LB       | 2.7 | 0.80 | 0.05 | 1.8 |
| 50             | PAVED SEDIMENT | LB       | 3.3 | 1.2  | 0.03 | 2.1 |
| 10             | SEDIMENT       | ES       | 3.9 | 1.1  | 0.10 | 2.7 |
| 15             | SEDIMENT       | ES       | 2.4 | 0.65 | 0.04 | 1.7 |
| 19             | SEDIMENT       | LB       | 3.2 | 0.89 | 0.04 | 2.3 |
| 27             | SEDIMENT       | LB       | 3.1 | 0.94 | 0.04 | 2.1 |
| 29             | SEDIMENT       | LB       | 3.2 | 0.93 | 0.03 | 2.2 |
| 32             | SEDIMENT       | HL       | 3.2 | 1.1  | 0.03 | 2.1 |
| 49             | SEDIMENT       | LB       | 3.2 | 1.1  | 0.03 | 2.1 |
| 5              | DUNE           | ES       | 1.9 | 0.43 | 0.02 | 1.5 |
| 6              | DUNE           | ES       | 2.0 | 0.45 | 0.02 | 1.5 |
| 26             | DUNE           | LB       | 1.6 | 0.43 | 0.02 | 1.2 |
| 33             | DUNE           | ES       | 1.8 | 0.31 | 0.02 | 1.5 |
| 36             | DUNE           | ES       | 2.8 | 0.43 | 0.02 | 2.3 |
| 43             | DUNE           | LB       | 2.3 | 0.63 | 0.04 | 1.6 |
| 44             | DUNE           | LB       | 1.9 | 0.46 | 0.03 | 1.4 |
| 47             | DUNE           | LB       | 2.0 | 0.63 | 0.04 | 1.3 |
| 48             | DUNE           | LB       | 2.2 | 0.52 | 0.01 | 1.6 |
| 103            | DUNE           | HL       | 2.1 | 0.74 | 0.01 | 1.3 |
| 104            | DUNE           | HL       | 1.6 | 0.48 | 0.01 | 1.1 |
| 107            | DUNE           | HL       | 1.7 | 0.46 | 0.01 | 1.2 |
